# Supplementary material for: Short-term neonatal outcomes in women with gestational diabetes treated using metformin versus insulin: a systematic review and meta-analysis of randomized controlled trials
Source: PubMed Central journal article supplement (PMC10063481; doi:10.1007/s00592-022-02016-5), 2023-01-03

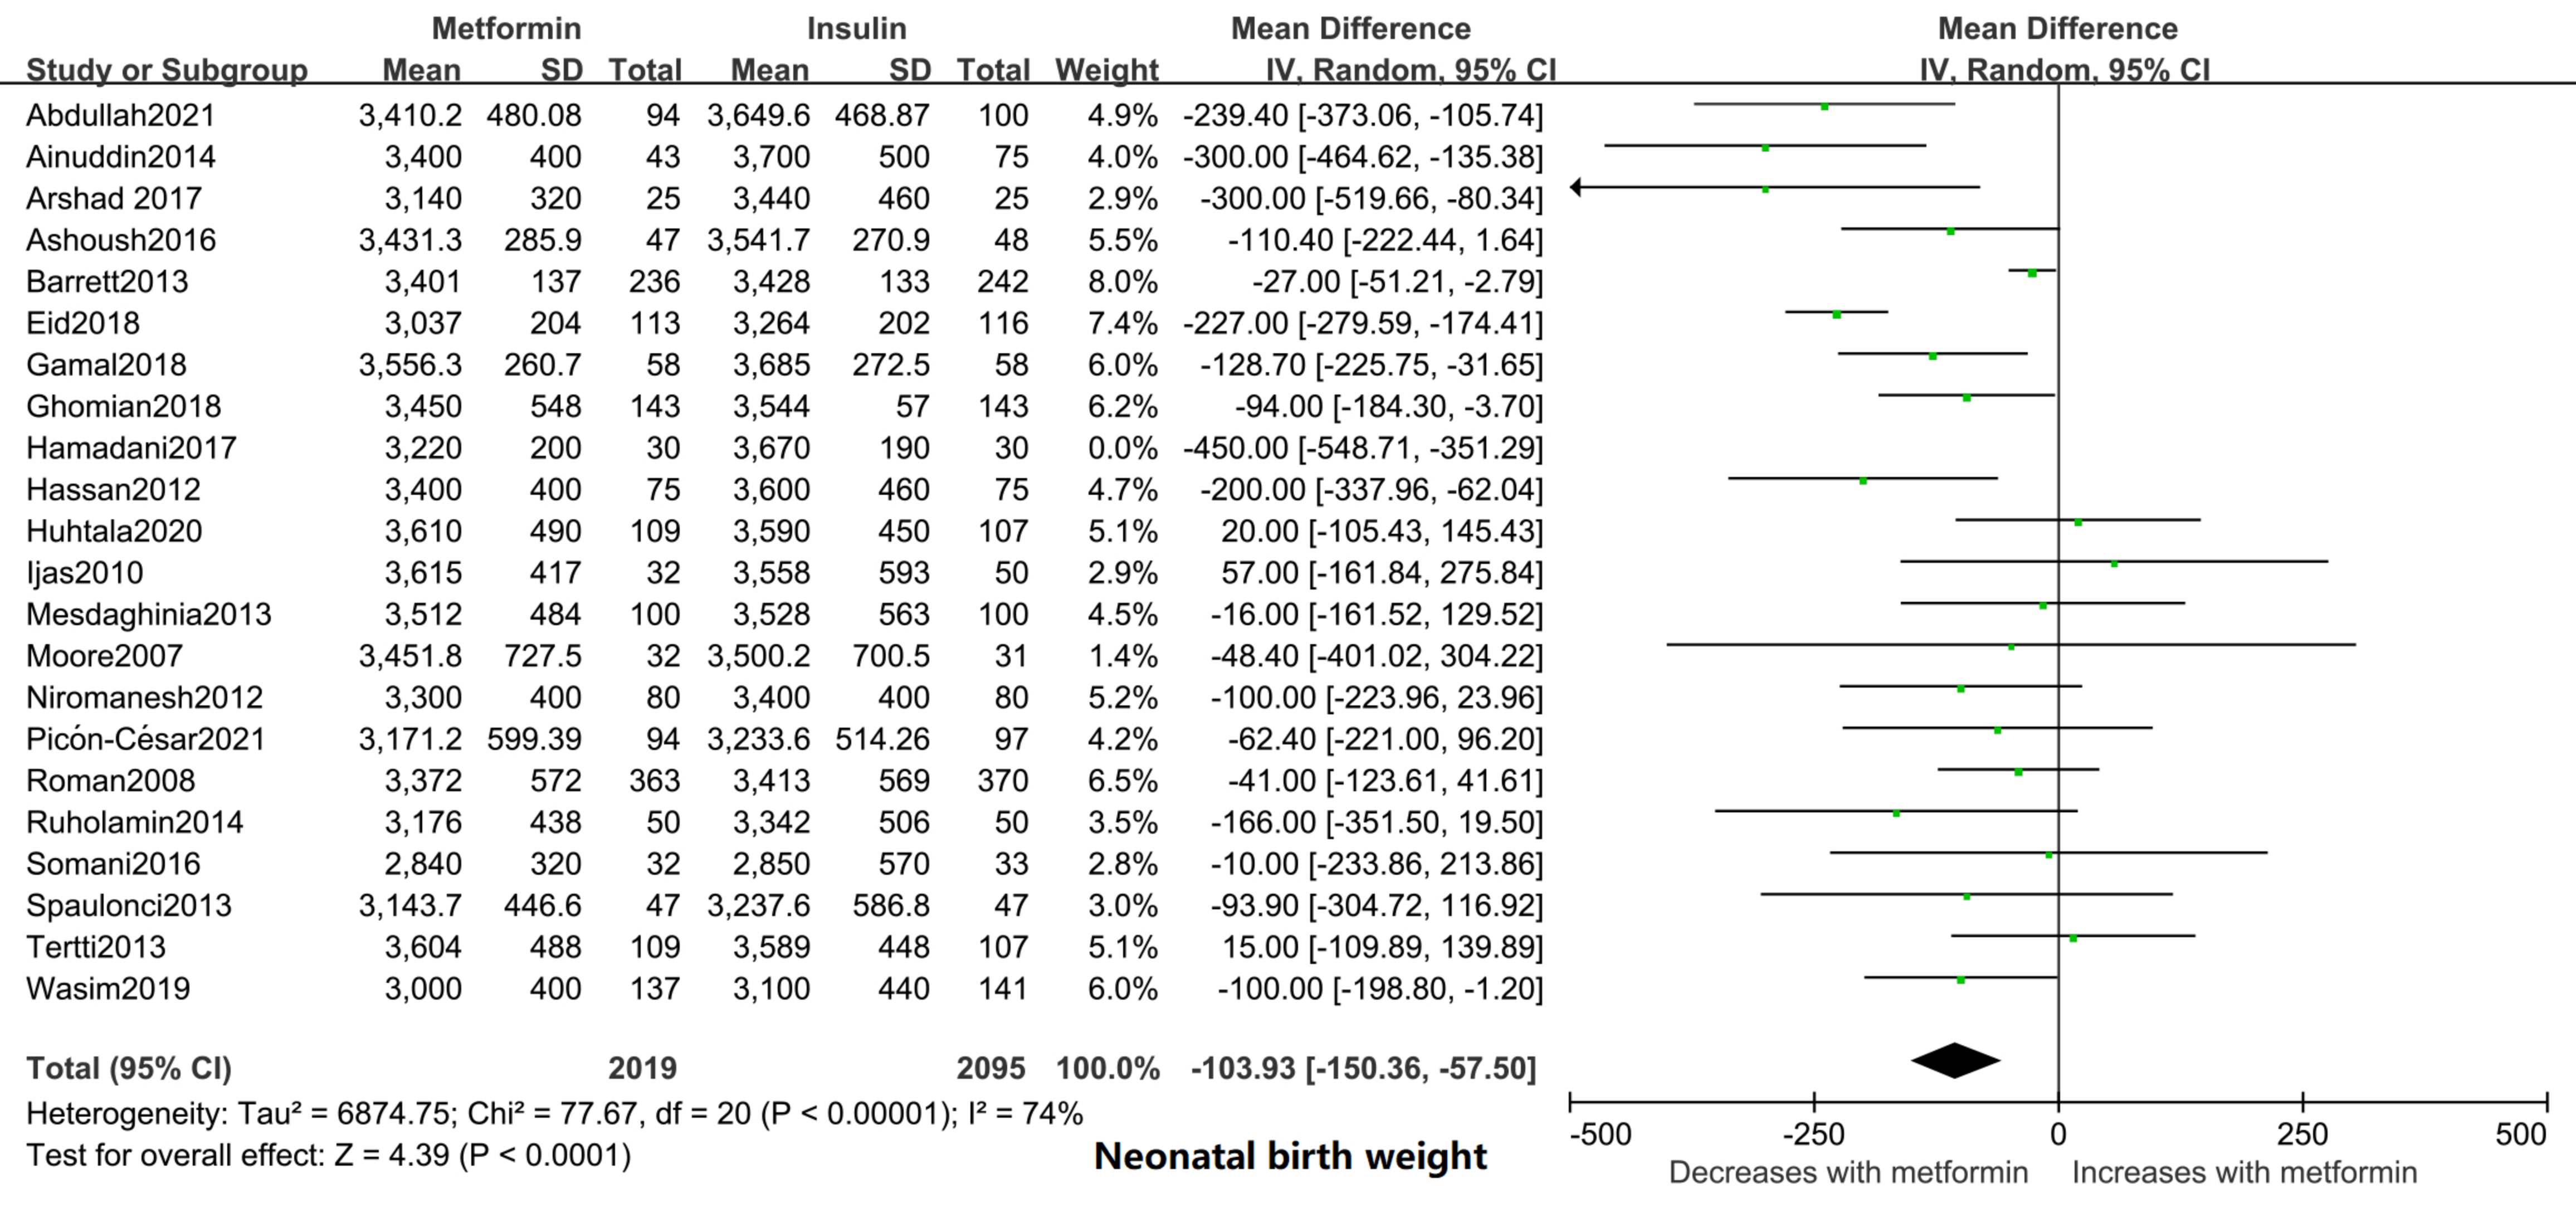

Supplement: 592_2022_2016_MOESM4_ESM.pdf [file 592_2022_2016_MOESM4_ESM.pdf]
